# Supplementary material
Source: ML conference proceedings conference paper supplement (https://proceedings.mlr.press/v139/jiang21g.html)
Supplement: Supplementary file [file jiang21g-supp.pdf]

## A. Mathematical Formulation

Let  $\theta$  and  $\phi$  denote the parameters of the joint policies and the probabilistic classifier, respectively. Then, the whole learning process corresponds to the following bi-level optimization:

$$\begin{aligned} \max_{\theta \in \Theta} \quad & J(\theta, \phi^*(\theta)) \\ \text{s.t.} \quad & \phi^*(\theta) = \arg \min_{\phi' \in \Phi} \mathcal{L}(\phi', \theta), \end{aligned}$$

where  $J$  is the RL objective with intrinsic reward,  $\mathcal{L}$  is the loss function of the probabilistic classifier, and  $\phi$  is an implicit function of  $\theta$ . Therefore, to solve this optimization, we can iteratively update  $\theta$  by

$$\frac{dJ(\theta, \phi^*(\theta))}{d\theta} = \left. \frac{\partial J(\theta, \phi)}{\partial \theta} \right|_{\phi=\phi^*(\theta)} + \frac{d\phi^*(\theta)}{d\theta} \left. \frac{\partial J(\theta, \phi)}{\partial \phi} \right|_{\phi=\phi^*(\theta)}$$

where

$$\frac{d\phi^*(\theta)}{d\theta} = - \left( \frac{\partial^2 \mathcal{L}(\phi, \theta)}{\partial \phi \partial \phi^T} \right)^{-1} \left( \frac{\partial^2 \mathcal{L}(\phi, \theta)}{\partial \phi \partial \theta^T} \right) \Big|_{\phi=\phi^*(\theta)}$$

which is obtained by the implicit function theorem. In practice, the second-order term is neglected due to high computational complexity, without incurring significant performance drop, such as in meta-learning and GANs. Therefore, we can solve the bi-level optimization by the first-order approximation with iterative updates:

$$\begin{aligned} \phi_{k+1} &\approx \arg \min_{\phi} \mathcal{L}(\phi, \mathcal{B}_k) \\ \theta_{k+1} &= \theta_k + \zeta_k \nabla_{\theta} J(\theta, \phi_{k+1}). \end{aligned}$$

## B. Hyperparameters

The hyperparameters of EOI and the baselines in each scenario are summarized in Table 1. Since QMIX and MAAC are off-policy algorithms with replay buffer, we do not need to maintain the buffer  $\mathcal{B}$  but build the training data from the replay buffer  $\mathcal{D}$ . For EDTI, ROMA, and HC, we use their default settings.

Table 1. Hyperparameters

| Hyperparameter            | Pac-man | Windy Maze         | Firefighters       | Battle             | 10_vs_10           |
|---------------------------|---------|--------------------|--------------------|--------------------|--------------------|
| runs with different seeds | 5       | 10                 | 5                  | 5                  | 5                  |
| horizon ( $T$ )           | 30      | 15                 | 20                 | 100                | 100                |
| discount ( $\gamma$ )     |         | 0.98               |                    | 0.96               | 0.995              |
| replay buffer size        |         |                    | $2 \times 10^4$    |                    | $1 \times 10^4$    |
| actor learning rate       |         | $1 \times 10^{-3}$ |                    | -                  | $3 \times 10^{-4}$ |
| critic learning rate      |         | $1 \times 10^{-4}$ |                    | -                  | $1 \times 10^{-4}$ |
| QMIX learning rate        |         |                    | $1 \times 10^{-4}$ |                    | -                  |
| # MLP units               |         |                    | (128, 128)         |                    |                    |
| batch size                |         |                    | 128                |                    |                    |
| MLP activation            |         |                    | ReLU               |                    |                    |
| optimizer                 |         |                    | Adam               |                    |                    |
| $\phi$ learning rate      |         | $1 \times 10^{-3}$ |                    | $1 \times 10^{-4}$ | $1 \times 10^{-4}$ |
| $\alpha$ in QMIX          |         | 0.05               |                    | 0.02               | -                  |
| $\alpha$ in MAAC          |         | 0.2                |                    | -                  | 0.04               |
| $\beta_1$                 |         | 0.04               |                    | 0.05               | 0.05               |
| $\beta_2$                 |         | 0.1                |                    | 0.05               | 0.05               |
| $\Delta t$                |         |                    | 4                  |                    |                    |
